# Supplementary material for: Vaccination with an Attenuated Ferritin Mutant Protects Mice against VirulentMycobacterium tuberculosis
Source: Hindawi journal article supplement (doi:10.1155/2015/385402), 2015-01-01
Supplement: f1 [file 385402.f1.pdf]

**Supplementary Figure 1.** Lung bacterial load in mice vaccinated for 4 or 8 weeks.

**Supplementary Figure 2.** Spleen bacterial load in mice vaccinated for 4 or 8 weeks.

**Supplementary Figure 3.** Volume of lung granulomas in vaccinated and Mtb infected mice.

**Supplementary Table 1.** List of oligonucleotide primers used for qPCR

**Supplementary Table 2.** Validation of microarray gene expression by qPCR

**Supplementary Table 3.** List of SDEG involved in inflammatory response, STAT1 regulon, PC metabolism, PPARg regulon and fibrosis network

# Supplementary Figure 1

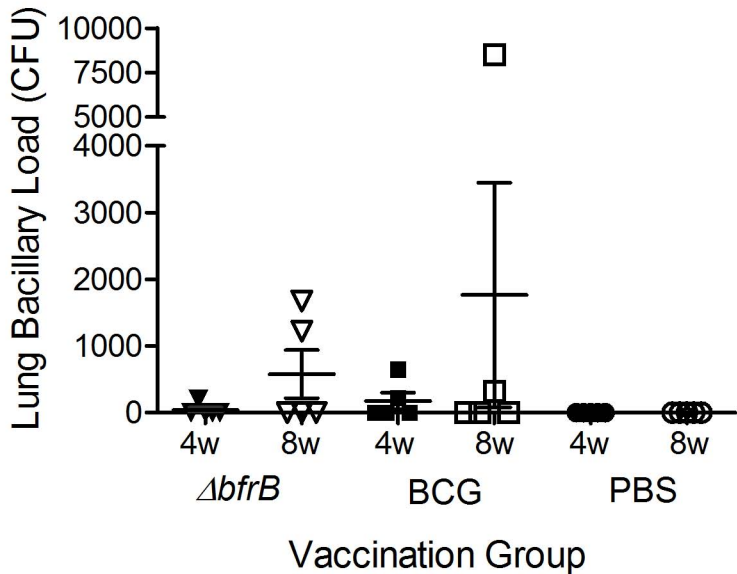

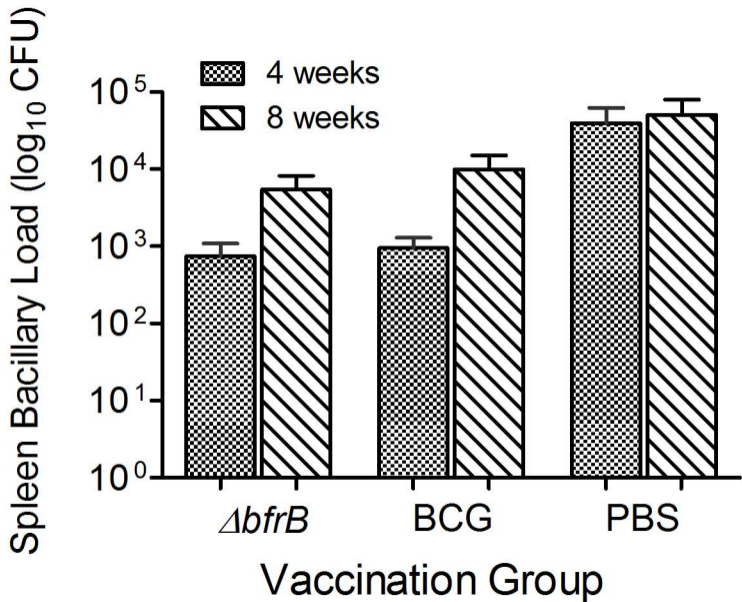

## Supplementary Figure 3

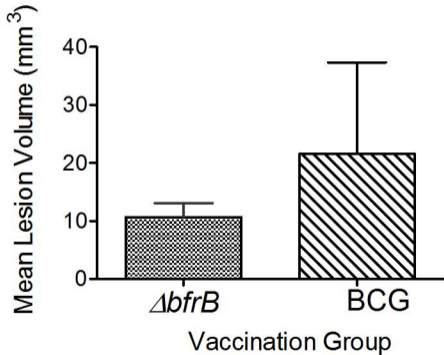

**Supplementary Table 1.** List of oligonucleotide primers used for qPCR

| <b>Gene</b>   | <b>Primer pair</b> | <b>Sequence (5'--&gt; 3')</b> | <b>Accession number</b> |
|---------------|--------------------|-------------------------------|-------------------------|
| <i>Aim1</i>   | Forward            | TGCCAGAAAACAACCTTTCAGA        | NM_172393               |
|               | Reverse            | CTGGGTCATACCGGCTTGC           |                         |
| <i>Bank1</i>  | Forward            | AGACTCAAGAGCCAAGTATCCT        | NM_001033350            |
|               | Reverse            | TCACCAGGTTTCTCACATGGAA        |                         |
| <i>Ccl20</i>  | Forward            | GCCTCTCGTACATACAGACGC         | NM_001159738            |
|               | Reverse            | CCAGTTCTGCTTTGGATCAGC         |                         |
| <i>Cxcl13</i> | Forward            | GGCCACGGTATTCTGGAAGC          | NM_018866               |
|               | Reverse            | GGGCGTAACTTGAATCCGATCTA       |                         |
| <i>Cd14</i>   | Forward            | CTCTGTCCTTAAAGCGGCTTAC        | NM_009841               |
|               | Reverse            | GTTGCGGAGGTTCAAGATGTT         |                         |
| <i>Cd274</i>  | Forward            | GCTCCAAAGGACTTGTACGTG         | NM_021893               |
|               | Reverse            | TGATCTGAAGGGCAGCATTTC         |                         |
| <i>Cxcl10</i> | Forward            | CCAAGTGCTGCCGTCATTTTC         | NM_021274               |
|               | Reverse            | GGCTCGCAGGGATGATTTCAA         |                         |
| <i>Cxcl11</i> | Forward            | GGCTTCCTTATGTTCAAACAGGG       | NM_019494               |
|               | Reverse            | GCCGTTACTCGGGTAAATTAC         |                         |
| <i>Cxcl2</i>  | Forward            | CCAACCACCAGGCTACAGG           | NM_033166               |
|               | Reverse            | GCGTCACACTCAAGCTCTG           |                         |
| <i>Cxcl9</i>  | Forward            | GGAGTTGAGGAACCCTAGTG          | NM_008599               |
|               | Reverse            | GGATTTGTAGTGGATCGTGC          |                         |
| <i>Il1b</i>   | Forward            | GCAACTGTTCTGAACTCAACT         | NM_008361               |
|               | Reverse            | ATCTTTTGGGGTCCGTCAACT         |                         |
| <i>Il2</i>    | Forward            | GTGCTCCTTGTC AACAGCG          | NM_023529               |
|               | Reverse            | GGGGAGTTTCAGGTTCTGTA          |                         |
| <i>Irgm1</i>  | Forward            | TGGCAATGGCATGTCATCTT          | NM_008326               |
|               | Reverse            | AGTACTCAGTCCGCGTCTTCGT        |                         |
| <i>Ms4a1</i>  | Forward            | CCCGGCAGTGTTACTGGAG           | NM_023529               |
|               | Reverse            | GTGCCATCTGGAACCAGG            |                         |
| <i>Scd1</i>   | Forward            | TTCTTGCGATACTCTGGTGC          | NM_177618               |
|               | Reverse            | CGGGATTGAATGTTCTTGTCGT        |                         |
| <i>Scd2</i>   | Forward            | CTCTGGCGCTTACTCAGCC           | NM_177292               |
|               | Reverse            | AGAAGGTGGCGCTGTGATTG          |                         |
| <i>Tnfa</i>   | Forward            | CTGGATGTCAATCAACAATGGGA       | NM_001001495            |

|               |         |                         |              |
|---------------|---------|-------------------------|--------------|
|               | Reverse | ACTAGGGTGTGAGTGTTTTCTGT |              |
| <i>IL1a</i>   | Forward | CGAAGACTACAGTTCTGCCATT  | NM_010554    |
|               | Reverse | GACGTTTCAGAGGTTCTCAGAG  |              |
| <i>IL1b</i>   | Forward | GCAACTGTTCTGAACTCAACT   | NM_008361    |
|               | Reverse | ATCTTTTGGGGTCCGTCAACT   |              |
| <i>IL10</i>   | Forward | GCTCTTACTGACTGGCATGAG   | NM_008348    |
|               | Reverse | CGCAGCTCTAGGAGCATGTG    |              |
| <i>IL13</i>   | Forward | CCTGGCTCTTGCTTGCCTT     | NM_008356    |
|               | Reverse | GGTCTTGTGTGATGTTGCTCA   |              |
| <i>IL12a</i>  | Forward | CTGTGCCTTGGTAGCATCTATG  | NM_001159424 |
|               | Reverse | GCAGAGTCTCGCCATTATGATTC |              |
| <i>IL12b</i>  | Forward | TGGTTTGCCATCGTTTTGCTG   | NM_008352    |
|               | Reverse | ACAGGTGAGGTTCACTGTTTCT  |              |
| <i>IL18ra</i> | Forward | AGACTACTTCTGAGCACAAAGA  | NM_010553    |
|               | Reverse | TGTCCTTACCAATGGTTCTCACT |              |
| <i>Ccl2</i>   | Forward | TTAAAAACCTGGATCGGAACCAA | NM_002982.3  |
|               | Reverse | GCATTAGCTTCAGATTTACGGGT |              |
| <i>Ccl7</i>   | Forward | GCTGCTTTCAGCATCCAAGTG   | NM_013654    |
|               | Reverse | CCAGGGACACCGACTACTG     |              |
| <i>Ccl8</i>   | Forward | TCTACGCAGTGCTTCTTTGCC   | NM_021443    |
|               | Reverse | AAGGGGGATCTTCAGCTTTAGTA |              |
| <i>Ccl12</i>  | Forward | ATTTCCACACTTCTATGCCTCCT | NM_011331.2  |
|               | Reverse | ATCCAGTATGGTCCTGAAGATCA |              |
| <i>Cxcl1</i>  | Forward | CTGGGATTCACCTCAAGAACATC | NM_008176    |
|               | Reverse | CAGGGTCAAGGCAAGCCTC     |              |
| <i>Cxcl3</i>  | Forward | GAAGATGGTTATCGTCACCACC  | NM_203320.3  |
|               | Reverse | CGTTCAGGCATTGTACCACT    |              |
| <i>Cxcl5</i>  | Forward | GTTCCATCTCGCCATTCATGC   | NM_009141    |
|               | Reverse | GCGGCTATGACTGAGGAAGG    |              |
| <i>Cxcl11</i> | Forward | GGCTTCCTTATGTTCAAACAGGG | NM_019494    |
|               | Reverse | GCCGTTACTCGGGTAAATTACA  |              |
| <i>Tgfb</i>   | Forward | CTGAGTGGCTGTCTTTTG      | NM_206958    |
|               | Reverse | TTGCTGTACTGTGTGTCC      |              |
| <i>Timp1</i>  | Forward | GCAACTCGGACCTGGTCATAA   | NM_001044384 |
|               | Reverse | CGGCCCGTGATGAGAACT      |              |
| <i>IL1r2</i>  | Forward | GTTTCTGCTTTCACCACTCCA   | NM_010555    |

|             |         |                         |           |
|-------------|---------|-------------------------|-----------|
| <i>Nos2</i> | Reverse | GAGTCCAATTTACTCCAGGTCAG | NM_194064 |
|             | Forward | GTTCTCAGCCCAACAATACAAGA |           |
|             | Reverse | GTGGACGGGTCGATGTCAC     |           |

**Supplementary Table 2.** Validation of microarray gene expression by qPCR\*

| <b>S. No</b> | <b>Genes</b>  | <b>qRT-PCR (mean)</b> | <b>sd</b> | <b>Microarray</b> |
|--------------|---------------|-----------------------|-----------|-------------------|
| 1            | <i>Aim1</i>   | 0.06                  | 0.02      | 0.88              |
| 2            | <i>Bank1</i>  | 0.06                  | 0.03      | 0.50              |
| 3            | <i>Ccl20</i>  | 0.03                  | 0.01      | 0.49              |
| 4            | <i>Cd14</i>   | 0.69                  | 0.31      | 0.71              |
| 5            | <i>Cd274</i>  | 0.20                  | 0.13      | 0.85              |
| 6            | <i>Cxcl10</i> | 0.06                  | 0.03      | 0.72              |
| 7            | <i>Cxcl11</i> | 0.02                  | 0.01      | 0.72              |
| 8            | <i>Cxcl13</i> | 0.14                  | 0.06      | 0.53              |
| 9            | <i>Cxcl2</i>  | 0.03                  | 0.01      | 0.79              |
| 10           | <i>Cxcl9</i>  | 0.16                  | 0.07      | 0.75              |
| 11           | <i>Il1b</i>   | 0.10                  | 0.01      | 0.70              |
| 12           | <i>Il2</i>    | 0.01                  | 0.01      | 0.85              |
| 13           | <i>Irgml</i>  | 0.22                  | 0.20      | 0.77              |
| 14           | <i>Ms4a1</i>  | 0.06                  | 0.02      | 0.48              |
| 15           | <i>Scd1</i>   | 11.08                 | 8.56      | 1.35              |
| 16           | <i>Scd2</i>   | 1.09                  | 0.12      | 1.44              |
| 17           | <i>Tnfa</i>   | 2.9E-04               | 1.8E-04   | 0.70              |

\*the qPCR and microarray data shown are log<sub>2</sub> expression ratio in the  $\Delta bfrB$  vaccinated, relative to BCG vaccinated, Mtb-infected mice.
